# Supplementary material for: Staphylococcus aureus utilizes environmental RNA as a building material in specific polysaccharide-dependent biofilms
Source: PubMed Central journal article supplement (PMC8980062; doi:10.1038/s41522-022-00278-z), 2022-04-04
Supplement: 41522_2022_278_MOESM1_ESM.pdf [file 41522_2022_278_MOESM1_ESM.pdf]

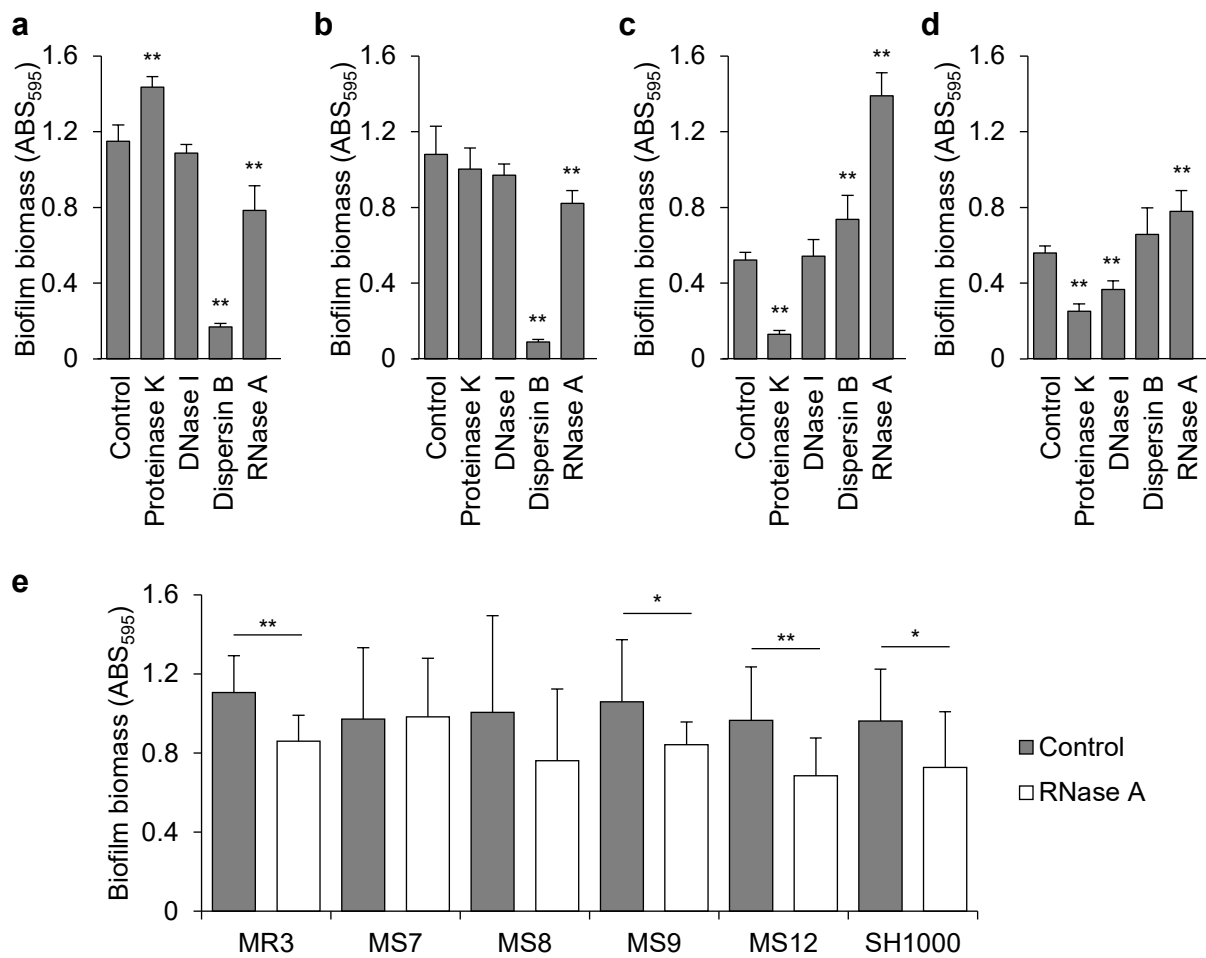

**Supplementary Figure 1. Effects of enzymes on polysaccharide-dependent and -independent staphylococcal biofilms.** (a, b) The *S. aureus* laboratory strain RN4220 was cultured in BHIN. (c, d) The clinically isolated *S. aureus* strain USA300 was cultured in BHIG. (e) The indicated polysaccharide-producing strains were cultured in BHIN. (a, c) Inhibition of biofilm formation by the indicated enzymes was examined. These enzymes were added to the media at the onset of biofilm formation. (b, d, e) Biofilm dispersal was analyzed. The 24-h biofilms were treated with the indicated enzymes. As controls, the biofilms were left untreated. The data are presented as the mean and standard deviation (error bar) of three independent experiments. \*\* $P < 0.01$ .

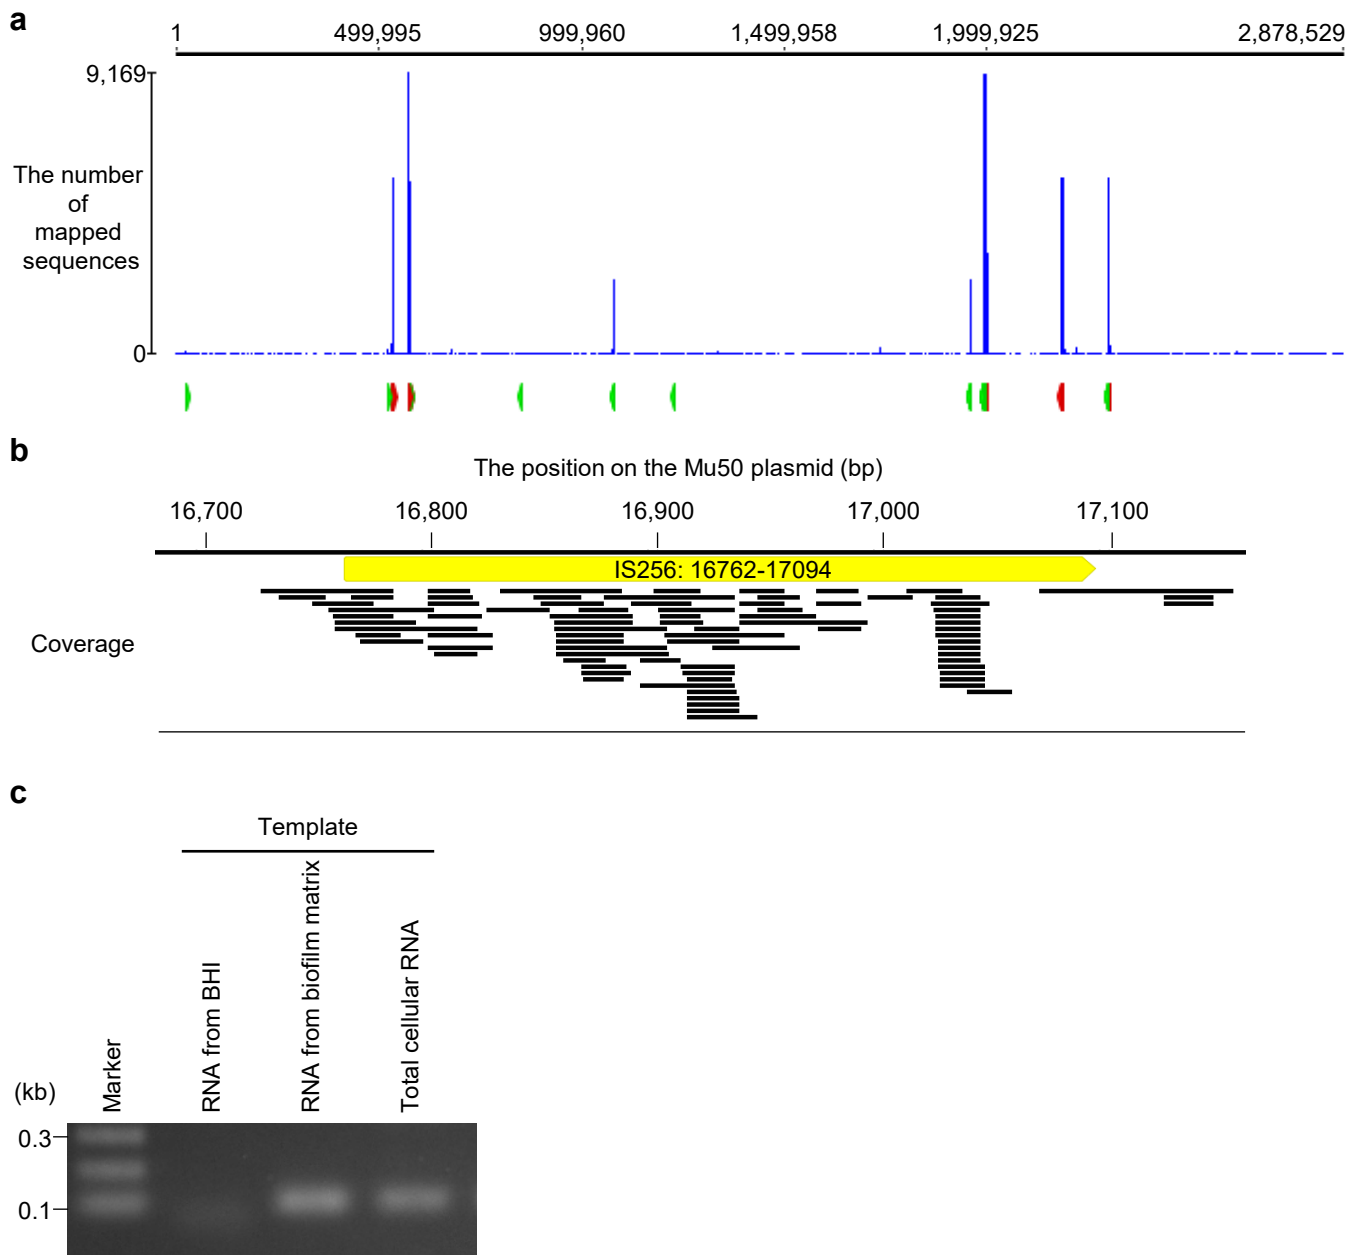

**Supplementary Figure 2. Extracellular RNAs derived from *S. aureus*.** (a) The 110,111 sequences obtained through RNA-seq were mapped to the *S. aureus* Mu50 genome. The green and red markers represent the positions and directions of tRNA and rRNA, respectively. (b) RNA-seq data showing the coverage of cDNA reads over the IS256 gene in the plasmid of *S. aureus* Mu50 (position 16,762–17,094). (c) RT-PCR detection of the IS256 RNA fragment that can be released from *S. aureus* MR10 into the extracellular milieu. The primers were designed based on the IS256 sequence. The templates for RT-PCR were RNAs purified from BHI medium and MR10 24-h biofilm matrices, and total cellular RNAs extracted from MR10 biofilm cells grown in BHIN. Total RNA was extracted using the RNeasy Maxi kit (Qiagen, Hilden, Germany) according to the manufacturer's protocol. Amplicons were analyzed using agarose gel electrophoresis.

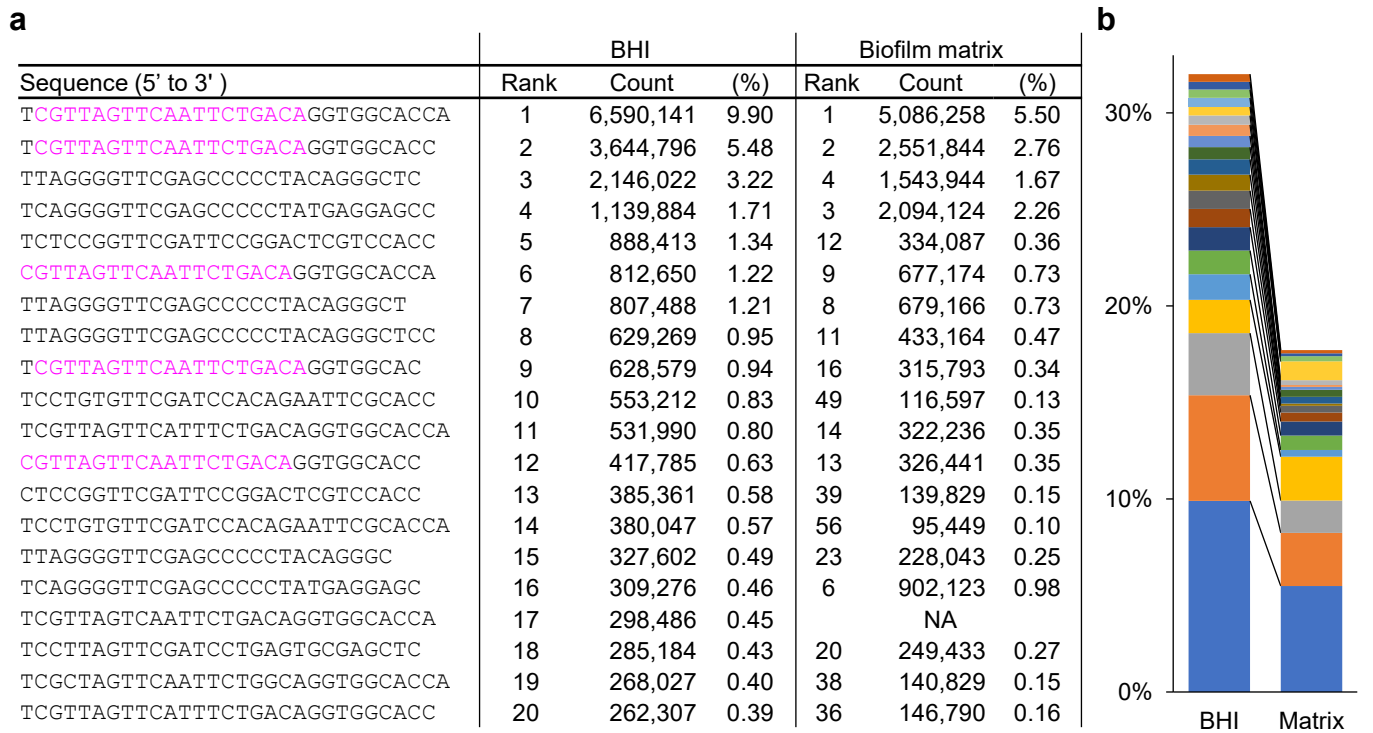

**Supplementary Figure 3. Comparison of RNA contents between BHI and biofilm matrix.** (a) Sequences of RNAs purified from BHI medium and the biofilm matrix of MR10 were analyzed by RNA-seq. The top 20 abundant RNAs in the medium are shown. Abundant RNA sequences found in the biofilm matrix (termed 19R) is colored in magenta. (b) A graphical representation of data in a.

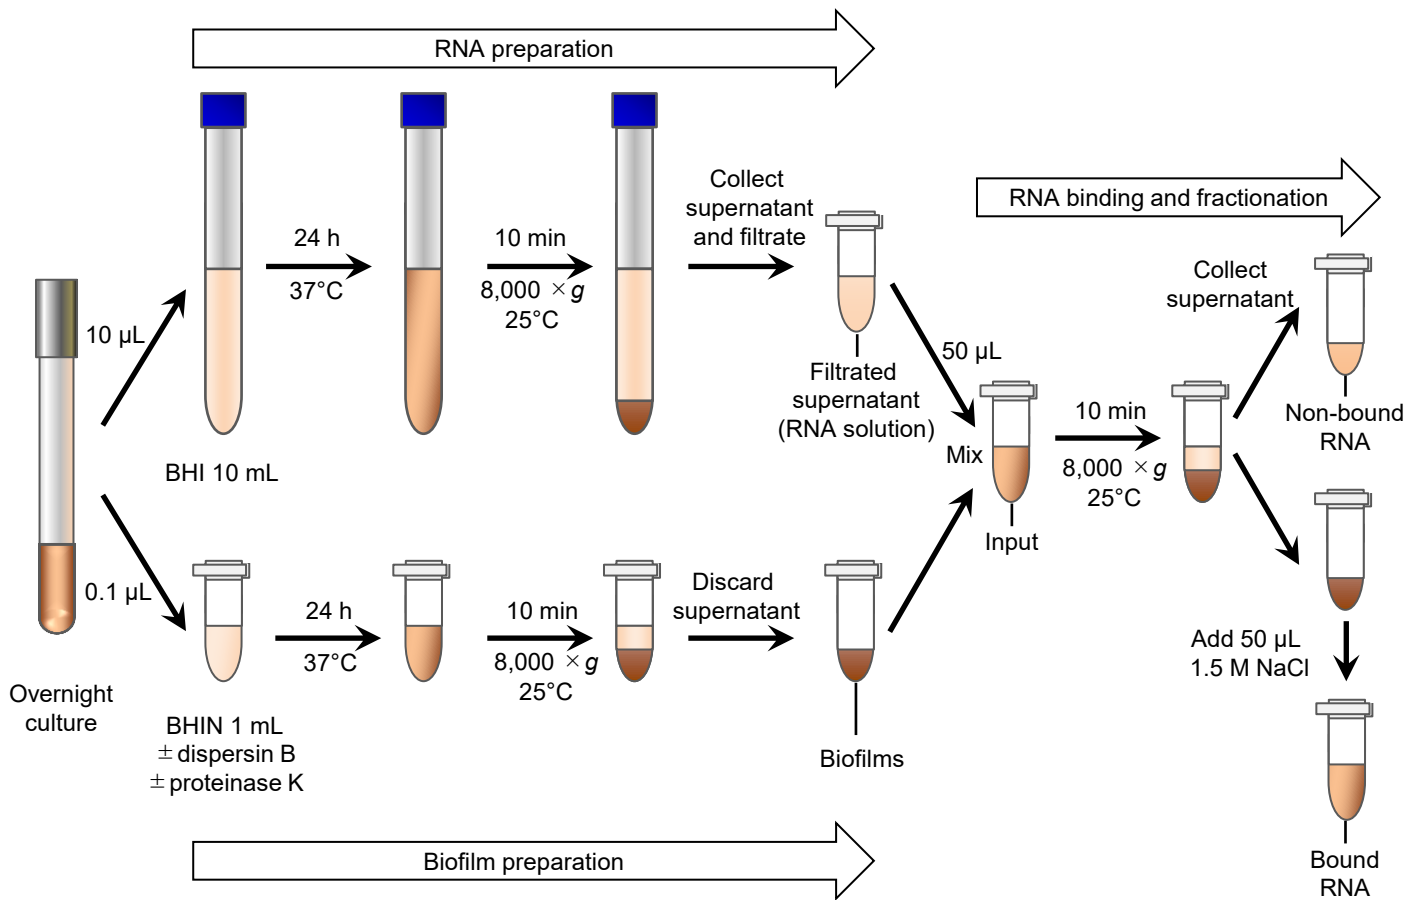

**Supplementary Figure 4. Scheme of RNA pull-down.** RNA was prepared from a 24-h culture of MR10 in BHI medium (upper process) and the culture supernatant was filtered and used as an RNA solution. In parallel, MR10 biofilms were formed in BHIN for 24 h at 37°C and harvested in a tube (lower process). If required, the biofilms were treated with dispersin B or proteinase K for 30 min at 37°C. The pelleted fraction was used as the biofilm cell. The resultant RNA solution and biofilm cells were mixed and immediately centrifuged, and the supernatant was used as the non-bound RNA fraction. The residual pellet, upon being resuspended in 1.5 M NaCl, was used as a bound RNA fraction.

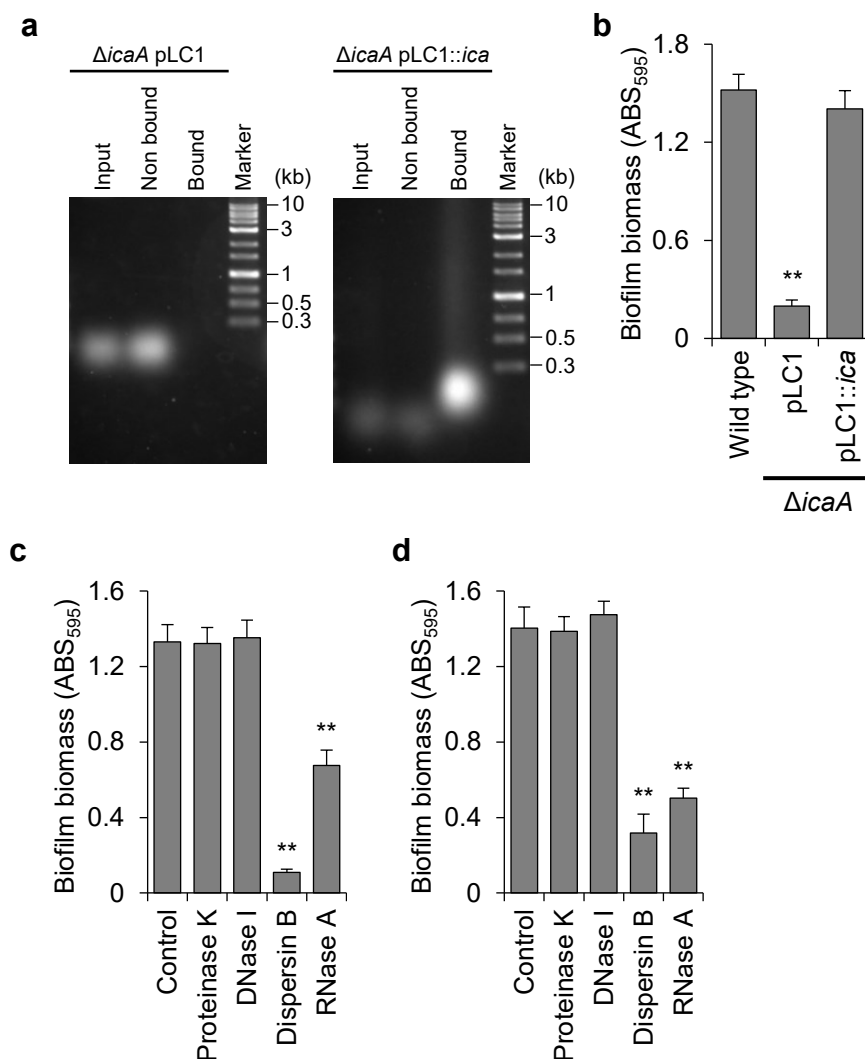

**Supplementary Figure 5. Complementation of the deletion of *ΔicaA* in the strain MR10.** (a) RNA pull-down was performed as illustrated in Supplementary Figure S3. Biofilm-associated and non-associated RNA from MR10 *ΔicaA* pLC1 (empty plasmid) and MR10 *ΔicaA* pLC1::*ica* were detected using agarose gel electrophoresis. (b) Biofilms of MR10 *ΔicaA* pLC1 and MR10 *ΔicaA* pLC1::*ica* were formed in the BHIN for 24 h. The biofilm biomasses of MR10 wild type are also shown as control (see Figure 1). (c) MR10 *ΔicaA* pLC1::*ica* 24-h biofilms were treated with the indicated enzymes for 30 min or left untreated (Control). (d) MR10 *ΔicaA* pLC1::*ica* biofilms were formed in the absence (Control) or presence of the indicated enzymes for 24 h. Biofilm biomasses are presented as the mean and standard deviation (error bar) of three independent experiments. \*\* $P < 0.01$ .

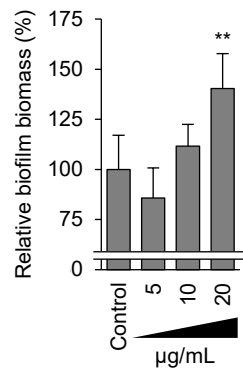

**Supplementary Figure 6. Promotion of biofilm formation by synthesized RNA.** Synthesized RNA named 19R (Supplementary Table S1) was added to RPMIG at the indicated concentrations from the onset of biofilm formation by the strain MR10. The biofilm biomass was measured after incubation for 24 h. The data are presented as the mean and standard deviation (error bar) of the relative biofilm biomass from three independent experiments. The biofilm biomasses in the absence of 19R (Control) were defined as 100%. \*\* $P < 0.01$ .

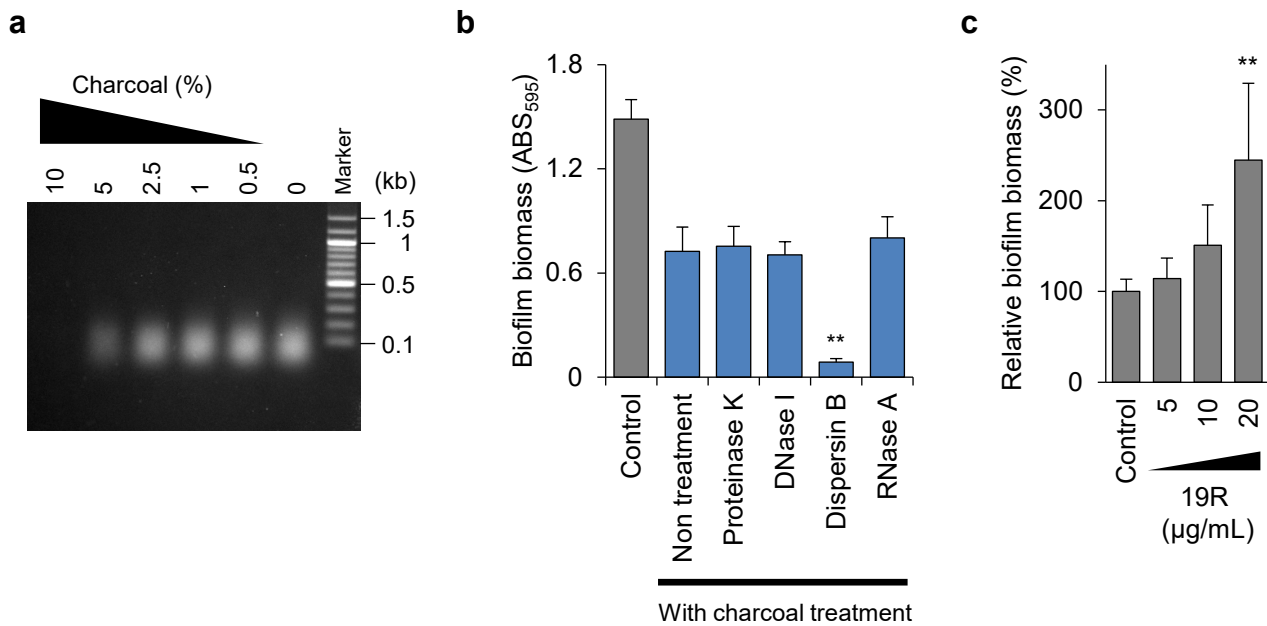

**Supplementary Figure 7. Biofilm formation in the RNA-depleted BHI medium.** (a) The indicated concentrations of activated charcoal and BHIN were mixed and filtrated. Then, the nucleic acid contents in the media were analyzed using agarose gel electrophoresis. (b) Biofilms of the strain MR10 were formed in the BHIN treated with 10% activated charcoal (BHINC). The 24-h biofilms were treated with the indicated enzymes for 30 min at 37°C and quantified. The data are presented as the mean and standard deviation of three independent experiments. The biomasses of the biofilms formed in BHIN without treatment with charcoal are also shown as control (see Figure 1). (c) The synthesized RNA named 19R was added into BHINC at the indicated concentrations from the onset of biofilm formation. The biofilm biomass was measured after incubation for 24 h. The data are presented as the mean and standard deviation (error bar) of relative biofilm biomass from three independent experiments. The biofilm biomasses in the absence of 19R (Control) were defined as 100%. \*\* $P < 0.01$ .

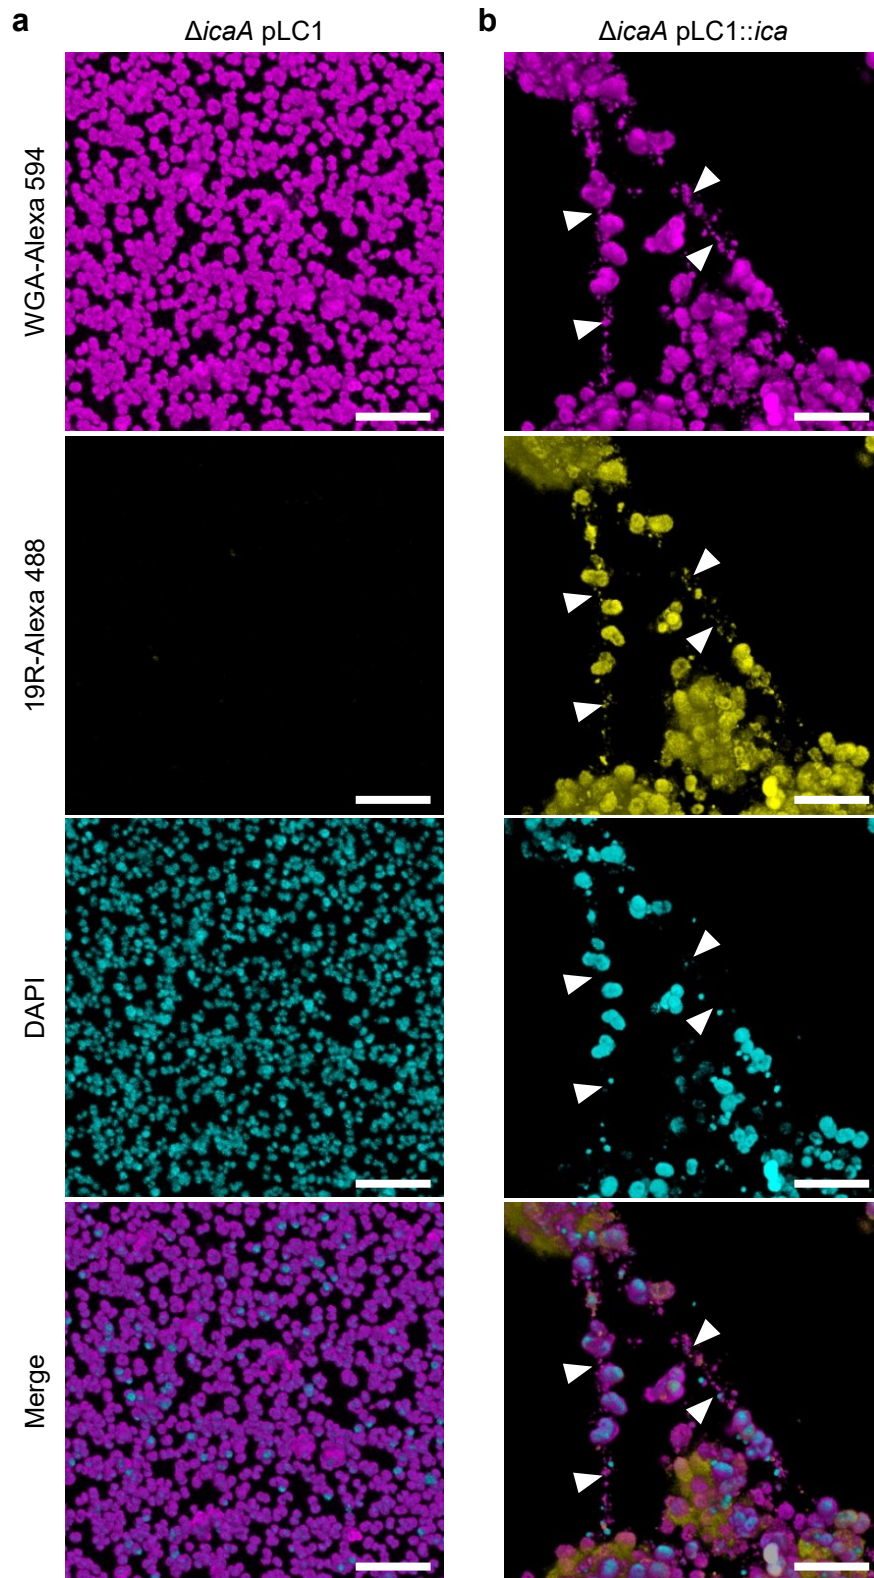

**Supplementary Figure 8. Localization of polysaccharides and RNA in the biofilms of MR10  $\DeltaicaA$  harboring pLC1 and pLC1::*ica*.** MR10  $\DeltaicaA$  pLC1 (**a**) and pLC1::*ica* (**b**) were cultured in BHINC supplemented with 19R-Alexa 488 for 24 h at 37°C. The biofilms were stained with WGA-Alexa 594 and DAPI. Subsequently, the biofilms were observed using CLSM (with Airyscan unit). WGA-Alexa 594 and DAPI stained the polysaccharides and the cell wall (magenta) and DNA (cyan), respectively. 19R-Alexa 488 indicates localization of RNA (yellow). The merged images are also shown. The scale bars correspond to 5  $\mu$ m. The arrowheads indicate co-localization of the polysaccharides and RNA.



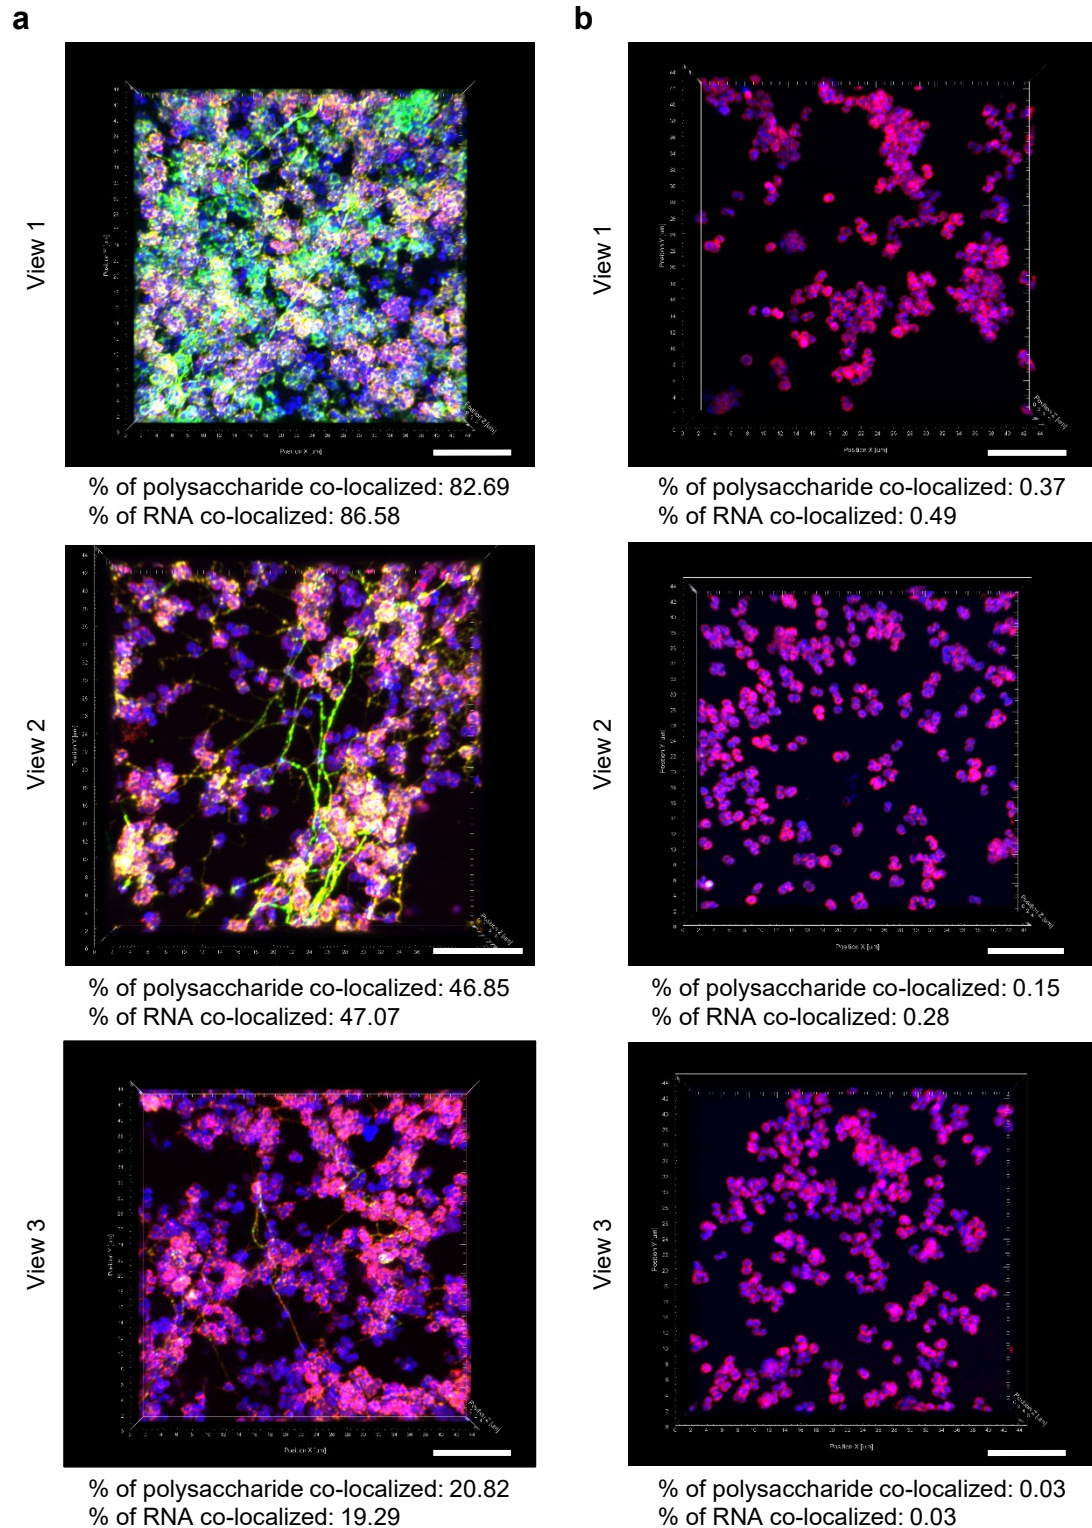

**Supplementary Figure 9. Image analysis for co-localization of RNA and polysaccharides.** Biofilms of the MR10 wild-type (**a**) and  $\Delta$ *icaA* (**b**) strains were observed using high-resolution CLSM, as shown in Figure 5c. Representative three views of each strain are shown. View 2 consists of low magnification images of Figure 5c. WGA-Alexa 594 and DAPI stained the polysaccharides and the cell wall (magenta) and DNA (blue), respectively. 19R-Alexa 488 indicates localization of RNA (green). Co-localization of the RNA and polysaccharides was analyzed with Imaris (Oxford Instruments, Abingdon, UK). The bars correspond to 10  $\mu$ m.

**Supplementary Table 1. Oligonucleotides used in this study.**

| Name          | Sequence (from 5' to 3')                                      | Description                                                                                                    |
|---------------|---------------------------------------------------------------|----------------------------------------------------------------------------------------------------------------|
| <b>Primer</b> |                                                               |                                                                                                                |
| f9959-F       | GAAAGCACCGTTTCCCGTC                                           | A specific forward primer to amplify the fragment identified by RNA-seq                                        |
| f9959-R       | AGATTGCAGCACCTGAGTTTC                                         | A specific reverse primer to amplify the fragment identified by RNA-seq                                        |
| f8400-F       | TCATTTGTATACGACTTAGATGTACAACGG                                | A specific forward primer to amplify the fragment identified by RNA-seq                                        |
| f8400-R       | ACAAATCAGACAACAAAGGCTTAATCTC                                  | A specific reverse primer to amplify the fragment identified by RNA-seq                                        |
| Rf235287-F    | TAATTGAACGACTGAATCAAGAAGTACG                                  | A specific forward primer to amplify the IS256 fragment                                                        |
| Rf235287-R    | GAACGGCTCCAATTAAGCGA                                          | A specific reverse primer to amplify the IS256 fragment                                                        |
| gem2928-2949  | CAAGGCGATTAAGTTGGGTAAC                                        | Designed from pGEM-T vector for sequencing of cloned DNA fragments                                             |
| gem231-209    | GTATGTTGTGTGGAATTGTGAGC                                       | Designed from pGEM-T vector for sequencing of cloned DNA fragments                                             |
| icaAKO_F      | GGGGACAAGTTTGTACAAAAAAGCAGGCTGAAT<br>TGATATAAAGCATCAATTGAATAG | A specific forward primer to amplify the upstream region of <i>icaA</i> in MR10                                |
| icaAKO_R      | GGGGACCACCTTGTACAAAGAAAGCTGGGTCAGA<br>AAATTCGCTTTTCTTACAC     | A specific reverse primer to amplify the downstream region of <i>icaA</i> in MR10                              |
| SOE_icaA_F    | ATTGAACAAGAAGCCTGACATAAATAATCATCG<br>CTAAATATTGTAAGAGA        | A specific forward primer to amplify the downstream region of <i>icaA</i> in MR10                              |
| SOE_icaA_R    | TCTCTTACAATATTTAGCGATGATTATTTATGT<br>CAGGCTTCTTGTTC AAT       | A specific reverse primer to amplify the upstream region of <i>icaA</i> in MR10                                |
| pLC1-F        | CTGCAGCCAAGCTAGCTTGGC                                         | A specific forward primer to amplify and linearize pLC1                                                        |
| pLC1-R        | CCCGGGAGATCTGATATCAAGCTTATTTTA                                | A specific forward primer to amplify and linearize pLC1                                                        |
| comp_ica_F    | TTGATATCAGATCTCCCGGGAACCTAACTAACG<br>AAAGGTAGGTAAAGAAA        | A specific forward primer to amplify the <i>ica</i> operon containing the ribosome-binding site of <i>icaA</i> |
| comp_ica_R    | CCAAGCTAGCTTGGCTGCAGCCACCGCGTGT<br>TTAACAT                    | A specific forward primer to amplify the <i>ica</i> operon containing the ribosome-binding site of <i>icaA</i> |
| 19R           | CGUUAGUUCAAUUCUGACA                                           | The most highly conserved sequence in external RNAs identified by RNA-seq                                      |

**Supplementary Note. Counting script.** This short script named “Genomcount” was written in C# to count all sequences in the NGS data. The trimmed RNA-seq data in fastq format were used as inputs for the script. The script outputs sequences and the number of counts in descending order of number.

```
using System.IO;
using System.Collections.Generic;
using System.Linq;

public class GenomCount
{
    public class GenomInfo
    {
        public GenomInfo(string genom, int count = 0) { this.genom = genom; this.count = count; }
        public string genom;
        public int count;
    }

    public static void Main(string[] args)
    {
        TextReader input =
            (args.Length == 0) ? Console.In :
            new StreamReader(args[0], System.Text.Encoding.GetEncoding("Shift_JIS"));

        ReadGenoms(input)
            .GroupBy(it => it)
            .Select(it => new GenomInfo(it.First(), it.Count()))
            .OrderByDescending(it => it.count)
            .Select(it => it.count.ToString() + "," + it.genom)
            .ToList()
            .ForEach(it => Console.WriteLine(it));
    }

    static IEnumerable<string> ReadGenoms(TextReader tr)
    {
        do
        {
            var line = tr.ReadLine();
            while (!line.StartsWith("@"))
            {
                if (line == null)
                    yield break;
                line = tr.ReadLine();
            }

            var genom = tr.ReadLine();
            tr.ReadLine(); //skip
            tr.ReadLine(); //skip
            yield return genom;
        } while (tr.Peek() != -1);
    }
}
```
